# Supplementary material for: Refinement of the rKLi8.3-Based Serodiagnostic ELISA Allows Detection of Canine Leishmaniosis in Dogs with Low Antibody Titers
Source: MDPI journal article supplement (doi:10.3390/pathogens13030246), 2024-03-13
Supplement: s1 [file s1]

**Supplemental Table S1. DPP, LFT and rKLi8.3-ELISA were negative for all healthy control samples.**

| Control sample | DPP | LFT | rKLi8.3-ELISA |
|----------------|-----|-----|---------------|
| C 02           | –   | –   | –             |
| C 03           | –   | –   | –             |
| C 04           | –   | –   | –             |
| C 05           | –   | –   | –             |
| C 06           | –   | –   | –             |
| C 07           | –   | –   | –             |
| C 08           | –   | –   | –             |
| C 09           | –   | –   | –             |
| C 10           | –   | –   | –             |
| C 11           | –   | –   | –             |
| C 12           | –   | –   | –             |
| C 13           | –   | –   | –             |
| C 14           | –   | –   | –             |
| C 15           | –   | –   | –             |
| C 17           | –   | –   | –             |
| C 18           | –   | –   | –             |
| C 19           | –   | –   | –             |
| C 21           | –   | –   | –             |
| C 22           | –   | –   | –             |
| C 23           | –   | –   | –             |
| C 24           | –   | –   | –             |
| C 25           | –   | –   | –             |

DPP = Dual Path Platform (DPP®, Biomanguinhos, Fiocruz-RJ, Brazil).  
LFT = Lateral flow test (INgezim® Leishma CROM, GSD Madrid, Spain).  
ELISA = rKLi8.3-ELISA (GSD Frankfurt, Germany).  
(–) = Negative result.
